# Supplementary material for: Cross-domain binding of anti-fibrillation peptide TNGQ to islet amyloid polypeptide provides cytoprotective effects in giant unilamellar vesicles and pancreatic β-cells
Source: Royal Society of Chemistry journal article supplement (doi:10.1039/d4fo03322a), 2024-01-01
Supplement: d4fo03322a1.xlsx [file d4fo03322a1.xlsx]

## Sheet: Figure 1
Time (h)	Triton-X			Control			IAPP control			IAPP+MANT			IAPP+YMSV			IAPP+TNGQ
0	4528	6102	4066	1079	1069	1086	1419	1417	1344	951	871	842	968	1237	1226	1001	1019	974
0.5	4187	5363	3751	1015	1025	1070	1412	1446	1348	937	895	851	927	1213	1233	980	985	937
1	4187	5304	3698	1012	1032	1101	1451	1484	1391	1031	944	892	975	1212	1253	994	978	997
1.5	4105	5280	3683	1034	1012	1067	1503	1516	1428	1107	1013	940	1025	1208	1258	1013	986	1026
2	4045	5256	3678	1051	981	1049	1535	1556	1484	1179	1066	990	1031	1229	1257	1028	1005	1042
2.5	4025	5262	3703	1067	969	1027	1561	1602	1557	1216	1121	1023	1041	1199	1250	1040	1009	1065
3	4022	5271	3700	1059	934	1012	1751	1630	1603	1308	1153	1062	1064	1201	1254	1050	1010	1078
3.5	4051	5270	3701	1060	927	991	1781	1679	1689	1351	1202	1085	1074	1215	1280	1055	1028	1089
4	4056	5274	3702	1074	915	978	1655	1659	1649	1419	1251	1066	1073	1208	1268	1074	1036	1114
4.5	4083	5291	3713	1087	907	966	1538	1542	1592	1445	1305	1067	1084	1221	1257	1072	1032	1101
5	4077	5285	3712	1099	901	944	1547	1578	1655	1411	1289	1068	1089	1212	1247	1085	1036	1119
5.5	4102	5279	3716	1093	891	940	1549	1536	1655	1431	1300	1080	1098	1223	1253	1090	1044	1124
6	4118	5268	3722	1108	885	928	1561	1527	1665	1456	1365	1147	1108	1221	1255	1089	1060	1128
6.5	4090	5281	3724	1123	877	929	1565	1544	1652	1485	1361	1173	1108	1234	1258	1142	1057	1137
7	4088	5287	3703	1107	875	921	1573	1558	1677	1491	1389	1107	1109	1233	1242	1154	1059	1139
7.5	4103	5278	3734	1133	878	920	1562	1551	1677	1525	1446	1094	1109	1238	1257	1167	1067	1149
8	4087	5293	3730	1115	870	910	1567	1568	1667	1545	1449	1098	1112	1242	1251	1177	1065	1149
8.5	4090	5291	3725	1122	874	904	1559	1571	1669	1562	1478	1112	1117	1248	1234	1178	1075	1143
9	4076	5299	3731	1125	876	903	1570	1574	1679	1590	1529	1111	1132	1250	1245	1182	1073	1152
9.5	4071	5295	3744	1133	878	895	1574	1589	1701	1612	1551	1112	1132	1249	1222	1187	1082	1165
10	4085	5293	3723	1128	871	887	1580	1601	1706	1658	1577	1121	1138	1250	1253	1197	1082	1173
10.5	4082	5290	3751	1135	869	883	1591	1590	1715	1610	1593	1134	1140	1262	1243	1194	1095	1175
11	4067	5324	3740	1139	868	877	1593	1596	1708	1600	1612	1135	1148	1265	1241	1202	1098	1184
11.5	4074	5295	3743	1135	873	879	1599	1603	1706	1611	1633	1139	1151	1265	1241	1203	1098	1187
12	4064	5284	3736	1143	862	873	1600	1601	1708	1624	1662	1159	1163	1270	1245	1202	1108	1198

## Sheet: Figure 2
Z-Average
	GUV+Triton X			GUV			GUV+IAPP			GUV+IAPP+MANT			GUV+IAPP+YMSV			GUV+IAPP+TNGQ
time (h)	Mean	SD	n	Mean	SD	n	Mean	SD	n	Mean	SD	n	Mean	SD	n	Mean	SD	n
0	14.79	0.22	3	1268	38.7	3	2139	34	3	2864	42.8	3	3173	75.3	3	1750	18.4	3
12	14.85	0.12	3	1363	52	3	7912	127.5	3	7021	136.8	3	6060	75.5	3	5042	67.3	3
PDI
	Triton-X			Control			IAPP control			IAPP+MANT			IAPP+YMSV			IAPP+TNGQ
time (h)	Mean	SD	n	Mean	SD	n	Mean	SD	n	Mean	SD	n	Mean	SD	n	Mean	SD	n
0	0.1037	0.015	3	0.4293	0.083	3	0.6822	0.34	3	0.9428	0.095	3	0.8712	0.17	3	0.7096	0.32	3
12	0.08667	0.0051	3	0.1797	0.12	3	1	0	3	1	0	3	0.9545	0.092	3	0.7856	0.36	3

## Sheet: Figure 4
IAPP control	IAPP+YMSV	IAPP+MANT	IAPP+TNGQ
15.0954	8.33846	29.3108	51.3169
7.04615	5.34769	35.7723	42.4554
0.769231	3.72308	5.23692	48.9908
2.68923	2.39385	6.27077	47.2923
